# Supplementary material for: Forelimb motor learning and memory consolidation drives distinct oligodendrocyte plasticity to fine-tune task-related neural activity
Source: Research Square preprint supplement (doi:10.21203/rs.3.rs-4579212/v1), 2024-06-25
Supplement: Supplementary file 1 [file 870bfc717dccfe8b6f7f18b2.xlsx]

## Sheet: Supplementary Table 2
	cRFA EdU+ cells					cRFA CC1+EdU+ cells					cRFA CC1+EdU+/EdU+ cells (%)
Figure 2	L1	L2/3	L5a	L5b	L6	L1	L2/3	L5a	L5b	L6	L1	L2/3	L5a	L5b	L6
10-day reaching task	Fig. 2d					Fig. 2e					Fig. 2f
non-learners	mean=185.2, n=4	mean=98.937, n=4	mean=148.1, n=4	mean=153.7, n=4	mean=162.3, n=4	mean=55.99, n=4	mean=26.44, n=4	mean=64.88, n=4	mean=58.98, n=4	mean=88.26, n=4	mean=32.86, n=4	mean=30.18, n=4	mean=45.51, n=4	mean=41.94, n=4	mean=56.47, n=4
learners	mean=96.34, n=3	mean=62.96, n=3	mean=100.3, n=3	mean=112.0, n=3	mean=85.80, n=3	mean=17.25, n=3	mean=16.49, n=3	mean=37.77, n=3	mean=48.20, n=3	mean=41.38, n=3	mean=14.23, n=3	mean=25.95, n=3	mean=38.32, n=3	mean=40.50, n=3	mean=47.89, n=3
Two-way ANOVA analysis	Training factor: F (1, 25) = 15.53, P=0.0006					Training factor: F (1, 25) = 22.97, P<0.0001					Training factor: F (1, 25) = 5.234, P=0.0309
Šídák's multiple comparisons test	adjusted p=0.0608	adjusted p=0.8144	adjusted p=0.5820	adjusted p=0.7082	adjusted p=0.1366	adjusted p=0.0229	adjusted p=0.9408	adjusted p=0.1809	adjusted p=0.9190	adjusted p=0.0045	adjusted p=0.1204	adjusted p=0.9890	adjusted p=0.8989	adjusted p>0.9999	adjusted p0.8115
	iRFA EdU+ cells					iRFA CC1+EdU+ cells					iRFA CC1+EdU+/EdU+ cells (%)
Figure 2	L1	L2/3	L5a	L5b	L6	L1	L2/3	L5a	L5b	L6	L1	L2/3	L5a	L5b	L6
10-day reaching task	Fig. 2h					Fig. 2i					Fig. 2j
non-learners	mean=198.3, n=4	mean=110.9, n=4	mean=138.9, n=4	mean=152.7, n=4	mean=165.6, n=4	mean=43.89, n=4	mean=38.95, n=4	mean=64.97, n=4	mean=62.95, n=4	mean=97.92, n=4	mean=22.02, n=4	mean=37.11, n=4	mean=47.82, n=4	mean=41.67, n=4	mean=59.36, n=4
learners	mean=175.5, n=3	mean=112.9, n=3	mean=157.8, n=3	mean=118.2, n=3	mean=123.8, n=3	mean=39.34, n=3	mean=41.39, n=3	mean=52.32, n=3	mean=52.02, n=3	mean=66.95, n=3	mean=21.48, n=3	mean=39.91, n=3	mean=31.62, n=3	mean=43.39, n=3	mean=52.67, n=3
Two-way ANOVA analysis	Training factor: F (1, 25) = 2.016, P=0.1680					Training factor: F (1, 25) = 3.245, P=0.0837					Training factor: F (1, 25) = 1.154, P=0.2929
Šídák's multiple comparisons test
	cCFA EdU+ cells					cCFA CC1+EdU+ cells					cCFA CC1+EdU+/EdU+ cells (%)
Supplementary Figure 3	L1	L2/3	L5a	L5b	L6	L1	L2/3	L5a	L5b	L6	L1	L2/3	L5a	L5b	L6
10-day reaching task	supplymentary Fig. S3a					supplymentary Fig. S3b					supplymentary Fig. S3c
non-learners	mean=215.3, n=6	mean=132.9, n=6	mean=170.0, n=6	mean=174.4, n=6	mean=219.5, n=6	mean=66.91, n=6	mean=47.60, n=6	mean=91.71, n=6	mean=87.98, n=6	mean=137.1, n=6	mean=29.61, n=6	mean=36.44, n=6	mean=54.21, n=6	mean=50.97, n=6	mean=61.43, n=6
learners	mean=139.8, n=4	mean=138.7, n=4	mean=177.2, n=4	mean=165.2, n=4	mean=168.7, n=4	mean=25.45, n=4	mean=48.97, n=4	mean=87.36, n=4	mean=86.60, n=4	mean=109.7, n=4	mean=23.05, n=4	mean=34.26, n=4	mean=47.25, n=4	mean=51.10, n=4	mean=65.31, n=4
Two-way ANOVA analysis	Training factor: F (1, 40) = 2.949, P=0.0937					Training factor: F (1, 40) = 2.430, P=0.1269					Training factor: F (1, 40) = 0.3635, P=0.5500
Šídák's multiple comparisons test
	iCFA EdU+ cells					iCFA CC1+EdU+ cells					iCFA CC1+EdU+/EdU+ cells (%)
Supplementary Figure 3	L1	L2/3	L5a	L5b	L6	L1	L2/3	L5a	L5b	L6	L1	L2/3	L5a	L5b	L6
10-day reaching task	supplymentary Fig. S3d					supplymentary Fig. S3e					supplymentary Fig. S3f
non-learners	mean=173.1, n=6	mean=134.4, n=6	mean=162.0, n=6	mean=188.9, n=6	mean=196.2, n=6	mean=58.08, n=6	mean=56.20, n=6	mean=79.63, n=6	mean=96.44, n=6	mean=119.2, n=6	mean=33.94, n=6	mean=42.39, n=6	mean=49.47, n=6	mean=50.28, n=6	mean=61.36, n=6
learners	mean=218.1, n=4	mean=155.2, n=4	mean=164.2, n=4	mean=144.2, n=4	mean=205.5, n=4	mean=45.93, n=4	mean=46.21, n=4	mean=59.04, n=4	mean=88.88, n=4	mean=106.9, n=4	mean=22.06, n=4	mean=34.45, n=4	mean=37.41, n=4	mean=62.19, n=4	mean=51.01, n=4
Two-way ANOVA analysis	Training factor: F (1, 40) = 0.4011, P=0.5301					Training factor: F (1, 40) = 2.689, P=0.1089					Training factor: F (1, 40) = 2.392, P=0.1298
Šídák's multiple comparisons test
