# Supplementary material for: Forelimb motor learning and memory consolidation drives distinct oligodendrocyte plasticity to fine-tune task-related neural activity
Source: Research Square preprint supplement (doi:10.21203/rs.3.rs-4579212/v1), 2024-06-25
Supplement: Supplementary file 2 [file aa65baff12abe248cb098022.xlsx]

## Sheet: Supplementary Table 3
	cRFA tdT+Olig2+ cells					cRFA CC1+tdT+Olig2+ cells					cRFA NG2+tdT+Olig2+ cells
Figure 8	L1	L2/3	L5a	L5b	L6	L1	L2/3	L5a	L5b	L6	L1	L2/3	L5a	L5b	L6
ptd14 (post treatment day14)	Fig. 6g					Fig. 6h					Fig. 6i
non-learners	mean=115.3, n=4	mean=129.5, n=4	mean=146.9, n=4	mean=134.3, n=4	mean=156.8, n=4	mean=18.05, n=4	mean=9.987, n=4	mean=33.87, n=4	mean=36.23, n=4	mean=51.94, n=4	mean=76.93, n=4	mean=64.43, n=4	mean=73.35, n=4	mean=78.31, n=4	mean=69.55, n=4
learners	mean=129.1, n=8	mean=142.1, n=8	mean=174.2, n=8	mean=161.4, n=8	mean=166.9, n=8	mean=14.05, n=8	mean=19.57, n=8	mean=30.47, n=8	mean=44.77, n=8	mean=44.49, n=8	mean=75.75, n=9	mean=79.04, n=9	mean=101.1, n=9	mean=82.91, n=9	mean=82.20, n=9
Two-way ANOVA analysis	Training factor: F (1, 50) = 7.490, P=0.0086					Training factor: F (1, 50) = 0.03723, P=0.8478					Training factor: F (1, 55) = 6.525, P=0.0134
Šídák's multiple comparisons test	adjusted p=0.8909	adjusted p=0.9208	adjusted p=0.3107	adjusted p=0.3216	adjusted p=0.9690	adjusted p=0.9900	adjusted p=0.7003	adjusted p=0.9953	adjusted p=0.7896	adjusted p=0.8683	adjusted p>0.9999	adjusted p=0.5791	adjusted p=0.0437	adjusted p=0.9951	adjusted p=0.7142
	cRFA tdT+Olig2+ cells					cRFA CC1+tdT+Olig2+ cells					cRFA NG2+tdT+Olig2+ cells
Figure 8	L1	L2/3	L5a	L5b	L6	L1	L2/3	L5a	L5b	L6	L1	L2/3	L5a	L5b	L6
ptd34 (post treatment day34)	Fig. 6l					Fig. 6m					Fig. 6n
non-learners	mean=142.0, n=5	mean=109.1, n=5	mean=132.9, n=5	mean=120.1, n=5	mean=137.4, n=5	mean=20.50, n=5	mean=28.27, n=5	mean=54.44, n=5	mean=63.78, n=5	mean=72.77, n=5	mean=98.66, n=5	mean=77.40, n=5	mean=101.0, n=5	mean=75.80, n=5	mean=85.07, n=5
learners	mean=161.8, n=8	mean=125.5, n=8	mean=169.1, n=8	mean=157.3, n=8	mean=163.0, n=8	mean=30.50, n=8	mean=38.56, n=8	mean=74.26, n=8	mean=66.52, n=8	mean=86.67, n=8	mean=108.0, n=8	mean=82.54, n=8	mean=104.5, n=8	mean=92.69, n=8	mean=98.90, n=8
Two-way ANOVA analysis	Training factor: F (1, 55) = 20.38, P<0.0001					Training factor: F (1, 55) = 11.08, P=0.0016					Training factor: F (1, 55) = 4.256, P=0.0439
Šídák's multiple comparisons test	adjusted p=0.5411	adjusted p=0.7224	adjusted p=0.0453	adjusted p=0.0367	adjusted p=0.2711	adjusted p=0.6617	adjusted p=0.6362	adjusted p=0.0393	adjusted p=0.9985	adjusted p=0.3180	adjusted p=0.9090	adjusted p=0.9928	adjusted p=0.9990	adjusted p=0.4558	adjusted p=0.6610
	cRFA Enpp6+ cells					iRFA Enpp6+ cells
Supplementary Figure 6	L1	L2/3	L5a	L5b	L6	L1	L2/3	L5a	L5b	L6
ptd14 (post treatment day14)	Fig. S6a					Fig. S6b
non-learners	mean=3.513, n=4	mean=6.200, n=4	mean=9.665, n=4	mean=15.08, n=4	mean=15.22, n=4	mean=10.27, n=4	mean=5.951, n=4	mean=15.93, n=4	mean=8.021, n=4	mean=14.60, n=4
learners	mean=9.151, n=9	mean=8.687, n=9	mean=14.85, n=9	mean=15.14, n=9	mean=22.11, n=9	mean=6.596, n=9	mean=9.019, n=9	mean=12.69, n=9	mean=14.39, n=9	mean=19.92, n=9
Two-way ANOVA analysis	Training factor: F (1, 55) = 5.900, P=0.0184					Training factor: F (1, 55) = 0.9394, P=0.3367
Šídák's multiple comparisons test	adjusted p=0.5194	adjusted p=0.9711	adjusted p=0.6064	adjusted p>0.9999	adjusted p=0.3045
	iRFA CC1+tdT+Olig2+ cells					iRFA NG2+tdT+Olig2+ cells
Supplementary Figure 6	L1	L2/3	L5a	L5b	L6	L1	L2/3	L5a	L5b	L6
ptd14 (post treatment day14)	Fig. S6c					Fig. S6d
non-learners	mean=22.36, n=4	mean=13.76, n=4	mean=19.53, n=4	mean=40.46, n=4	mean=47.71, n=4	mean=105.6, n=4	mean=56.55, n=4	mean=78.55, n=4	mean=70.13, n=4	mean=80.68, n=4
learners	mean=23.71, n=8	mean=20.99, n=8	mean=32.96, n=8	mean=43.78, n=8	mean=47.35, n=8	mean=85.26, n=9	mean=71.30, n=9	mean=91.74, n=9	mean=79.87, n=9	mean=87.37, n=9
Two-way ANOVA analysis	Training factor: F (1, 50) = 3.429, P=0.0700					Training factor: F (1, 55) = 0.8368, P=0.3643
Šídák's multiple comparisons test
	iRFA CC1+tdT+Olig2+ cells					iRFA NG2+tdT+Olig2+ cells
Supplementary Figure 6	L1	L2/3	L5a	L5b	L6	L1	L2/3	L5a	L5b	L6
ptd34 (post treatment day34)	Fig. S6e					Fig. S6f
non-learners	mean=24.13, n=5	mean=29.58, n=5	mean=57.23, n=5	mean=55.71, n=5	mean=70.30, n=5	mean=79.82, n=5	mean=72.30, n=5	mean=102.1, n=5	mean=93.06, n=5	mean=86.78, n=5
learners	mean=34.23, n=8	mean=37.75, n=8	mean=59.62, n=8	mean=69.67, n=8	mean=71.57, n=8	mean=77.52, n=8	mean=74.50, n=8	mean=97.71, n=8	mean=89.16, n=8	mean=106.0, n=8
Two-way ANOVA analysis	Training factor: F (1, 55) = 3.192, P=0.0795					Training factor: F (1, 55) = 0.1434, P=0.7064
Šídák's multiple comparisons test
