# Supplementary material for: Forelimb motor learning and memory consolidation drives distinct oligodendrocyte plasticity to fine-tune task-related neural activity
Source: Research Square preprint supplement (doi:10.21203/rs.3.rs-4579212/v1), 2024-06-25
Supplement: Supplementary file 3 [file c78e10bdbb78e6349a0b7ce6.xlsx]

## Sheet: Supplementary Table 1
	cRFA tdT+Olig2+ cells					cRFA CC1+tdT+Olig2+ cells					cRFA percentage of CC1+tdT+Olig2+ cells					cRFA NG2+tdT+Olig2+ cells
Figure 1	L1	L2/3	L5a	L5b	L6	L1	L2/3	L5a	L5b	L6	L1	L2/3	L5a	L5b	L6	L1	L2/3	L5a	L5b	L6
10-day reaching task	Fig. 1k					Fig. 1l					Fig. 1m					Fig. 1n
non-learners	mean=115.5, n=5	mean=115.7, n=5	mean=161.8, n=5	mean=188.1, n=5	mean=184.2, n=5	mean=32.06, n=5	mean=36.72, n=5	mean=77.44, n=5	mean=88.56, n=5	mean=94.53, n=5	mean=0.2709, n=5	mean=0.3157, n=5	mean=0.4766, n=5	mean=0.4642, n=5	mean=0.5078, n=5	mean=75.01, n=5	mean=56.10, n=5	mean=85.07, n=5	mean=79.24, n=5	mean=82.83, n=5
learners	mean=113.1, n=3	mean=92.50, n=3	mean=139.6, n=3	mean=155.2, n=3	mean=173.5, n=3	mean=23.97, n=3	mean=32.08, n=3	mean=40.37, n=3	mean=72.25, n=3	mean=84.82, n=3	mean=0.2098, n=3	mean=0.2989, n=3	mean=0.2732, n=3	mean=0.4738, n=3	mean=0.4837, n=3	mean=70.23, n=5	mean=64.58, n=5	mean=77.89, n=5	mean=85.19, n=5	mean=81.12, n=5
Two-way ANOVA analysis	Training factor: F (1, 30) = 4.409, P=0.0443					Training factor: F (1, 30) = 7.119, P=0.0122					Training factor: F (1, 30) = 5.666, P=0.0239					Training factor: F (1, 40) = 0.001485, P=0.9695
Šídák's multiple comparisons test	adjusted p>0.9999	adjusted p=0.7494	adjusted p=0.7843	adjusted p=0.4138	adjusted p=0.9878	adjusted p=0.9769	adjusted p=0.9982	adjusted p=0.0327	adjusted p=0.6906	adjusted p=0.9500	adjusted p=0.8071	adjusted p=0.9993	adjusted p=0.0048	adjusted p>0.9999	adjusted p=0.9959
	iRFA tdT+Olig2+ cells					iRFA CC1+tdT+Olig2+ cells					iRFA percentage of CC1+tdT+Olig2+ cells					iRFA NG2+tdT+Olig2+ cells
Figure 1	L1	L2/3	L5a	L5b	L6	L1	L2/3	L5a	L5b	L6	L1	L2/3	L5a	L5b	L6	L1	L2/3	L5a	L5b	L6
10-day reaching task	Fig. 1o					Fig. 1p					Fig. 1q					Fig. 1r
non-learners	mean=133.4, n=5	mean=106.6, n=5	mean=167.5, n=5	mean=170.5, n=5	mean=201.9, n=5	mean=18.97, n=5	mean=45.62, n=5	mean=71.15, n=5	mean=79.49, n=5	mean=101.1, n=5	mean=0.1401, n=5	mean=0.4177, n=5	mean=0.4227, n=5	mean=0.4673, n=5	mean=0.4949, n=5	mean=64.41, n=5	mean=65.75, n=5	mean=82.81, n=5	mean=63.07, n=5	mean=80.90, n=5
learners	mean=143.3, n=3	mean=107.3, n=3	mean=148.4, n=3	mean=143.9, n=3	mean=170.4, n=3	mean=34.46, n=3	mean=36.94, n=3	mean=65.00, n=3	mean=72.46, n=3	mean=75.69, n=3	mean=0.2229, n=3	mean=0.3344, n=3	mean=0.4442, n=3	mean=0.5173, n=3	mean=0.4399, n=3	mean=78.06, n=5	mean=73.24, n=5	mean=90.49, n=5	mean=74.53, n=5	mean=86.27, n=5
Two-way ANOVA analysis	Training factor: F (1, 30) = 1.404, P=0.2453					Training factor: F (1, 30) = 0.8315, P=0.3691					Training factor: F (1, 30) = 0.009940, P=0.9212					Training factor: F (1, 40) = 3.817, P=0.0578
Šídák's multiple comparisons test
	cCFA tdT+Olig2+ cells					cCFA CC1+tdT+Olig2+ cells					cCFA percentage of CC1+tdT+Olig2+ cells
Supplymentary Figure 2	L1	L2/3	L5a	L5b	L6	L1	L2/3	L5a	L5b	L6	L1	L2/3	L5a	L5b	L6
10-day reaching task	supplymentary Fig. S2a					supplymentary Fig. S2b					supplymentary Fig. S2c
non-learners	mean=178.7, n=6	mean=155.4, n=6	mean=166.5, n=6	mean=196.2, n=6	mean=253.2, n=6	mean=42.10, n=6	mean=46.14, n=6	mean=65.44, n=6	mean=94.36, n=6	mean=123.6, n=6	mean=0.2257, n=6	mean=0.2939, n=6	mean=0.3891, n=6	mean=0.4793, n=6	mean=0.4853, n=6
learners	mean=191.9, n=4	mean=146.5, n=4	mean=202.9, n=4	mean=210.3, n=4	mean=243.6, n=4	mean=39.40, n=4	mean=36.17, n=4	mean=80.88, n=4	mean=89.47, n=4	mean=117.0, n=4	mean=0.2063, n=4	mean=0.2463, n=4	mean=0.3951, n=4	mean=0.4253, n=4	mean=0.4800, n=4
Two-way ANOVA analysis	Training factor: F (1, 40) = 1.403, P=0.2431					Training factor: F (1, 40) = 0.07773, P=0.7818					Training factor: F (1, 40) = 0.8776, P=0.3545
Šídák's multiple comparisons test
	iCFA tdT+Olig2+ cells					iCFA CC1+tdT+Olig2+ cells					cCFA percentage of CC1+tdT+Olig2+ cells
Supplementary Figure 2	L1	L2/3	L5a	L5b	L6	L1	L2/3	L5a	L5b	L6	L1	L2/3	L5a	L5b	L6
10-day reaching task	supplymentary Fig. S2d					supplymentary Fig. S2e					supplymentary Fig. S2f
non-learners	mean=181.5, n=6	mean=166.9, n=6	mean=187.3, n=6	mean=200.2, n=6	mean=287.5, n=6	mean=50.09, n=6	mean=57.81, n=6	mean=76.79, n=6	mean=90.23, n=6	mean=150.4, n=6	mean=0.2987, n=6	mean=0.3423, n=6	mean=0.4232, n=6	mean=0.4506, n=6	mean=0.5207, n=6
learners	mean=231.9, n=4	mean=126.0, n=4	mean=182.1, n=4	mean=187.8, n=4	mean=297.5, n=4	mean=63.43, n=4	mean=38.26, n=4	mean=85.03, n=4	mean=83.30, n=4	mean=152.9, n=4	mean=0.2762, n=4	mean=0.2980, n=4	mean=0.4599, n=4	mean=0.4379, n=4	mean=0.5130, n=4
Two-way ANOVA analysis	Training factor: F (1, 40) = 0.001020, P=0.9747					Training factor: F (1, 40) = 0.004401, P=0.9474					Training factor: F (1, 40) = 0.1065, P=0.7459
Šídák's multiple comparisons test
	tdT+Olig2+ cells			CC1+tdT+Olig2+ cells
Supplementary Figure 2	corpus callosum	iWM	cWM	corpus callosum	iWM	cWM	iMT	cMT
10-day reaching task	S2h	S2j	S2j	S2i	S2k	S2k	S2i	S2i
non-learners	mean=866.8, n=6	mean=735.4, n=6	mean=864.8, n=6	mean=694.9, n=6	mean=526.5, n=6	mean=664.3, n=6	mean=78.63, n=6	mean=79.74, n=6
learners	mean=855.6, n=4	mean=726.7, n=4	mean=725.8, n=4	mean=663.9, n=4	mean=503.3, n=4	mean=500.6, n=4	mean=81.31, n=6	mean=84.15, n=6
t test	P = 0.8875	P = 0.846150	P = 0.387151	P = 0.6354	P = 0.561514	P = 0.190056	P = 0.777377	P = 0.621885
	Enpp6+ cells
Supplementary Figure 2	iRFA	cRFA	iCFA	cCFA	corpus callosum	iWM	cWM
10-day reaching task	S2m	S2m	S2n	S2n	S2p	S2q	S2q
non-learners	mean=8.728, n=5	mean=9.37, n=5	mean=6.434, n=6	mean=5.511, n=6	mean=38.59, n=6	mean=43.99, n=6	mean=37.44, n=6
learners	mean=8.249, n=8	mean=8.357, n=8	mean=8.416, n=6	mean=7.434, n=6	mean=33.17, n=6	mean=40.02, n=6	mean=41.92, n=6
t test	P = 0.745151	P = 0.56315	P = 0.261800	P = 0.394863	P = 0.4130	P = 0.520956	P = 0.501723
